# Supplementary material
Source: publisher figshare collection journal article supplement (https://acs.figshare.com/ndownloader/files/3967720)
Supplement: Supplementary file 1 [file 3967720]

data_global
_audit_creation_method                  'APEX2 v2010.9-1'

_publ_requested_journal                 'Journal of the American Chemical Society'

_publ_contact_author_name               'Ryan J. Trovitch'
_publ_contact_author_address            
;
Department of Chemistry and Biochemistry
Arizona State University
Tempe, AZ  85287-1604
;
_publ_contact_author_email              'ryan.trovitch@asu.edu'
_publ_contact_author_fax                '480-965-2747'
_publ_contact_author_phone              '480-727-8930'

loop_
_publ_author_name
_publ_author_address
'Tufan K. Mukhopadhyay'
;Department of Chemistry and Biochemistry
Arizona State University
Tempe, AZ 85287
;
'Marco Flores'
;Department of Chemistry and Biochemistry
Arizona State University
Tempe, AZ 85287
;
'Thomas L. Groy'
;Department of Chemistry and Biochemistry
Arizona State University
Tempe, AZ 85287
;
'Ryan J. Trovitch'
;Department of Chemistry and Biochemistry
Arizona State University
Tempe, AZ 85287
;

_publ_section_title                     
;
A Highly Active Manganese Precatalyst for the 
Hydrosilylation of Ketones and Esters 
;
_publ_section_abstract                  
;
;
_publ_section_references                
;
;
_publ_section_comment                   
;
;


data_Ph2PPrPDIMn
_chemical_name_systematic               ?
_chemical_name_common                   ?
_chemical_formula_moiety                'C39 H41 Mn N3 P2'
_chemical_formula_sum                   'C39 H41 Mn N3 P2'
_chemical_formula_iupac                 ?
_chemical_formula_weight                668.63

_chemical_melting_point                 ?

_space_group_crystal_system             triclinic
_space_group_name_H-M_alt               'P -1'
_space_group_name_Hall                  '-P 1'
loop_
    _space_group_symop_operation_xyz
    'x, y, z'
    '-x, -y, -z'

_cell_length_a                          10.773(2)
_cell_length_b                          12.341(2)
_cell_length_c                          14.004(3)
_cell_angle_alpha                       95.103(3)
_cell_angle_beta                        90.505(3)
_cell_angle_gamma                       115.432(2)
_cell_volume                            1672.5(5)
_cell_formula_units_Z                   2
_cell_measurement_reflns_used           4603
_cell_measurement_theta_min             2.2273
_cell_measurement_theta_max             26.2468
_cell_measurement_temperature           123.(2)

_exptl_crystal_description              block
_exptl_crystal_colour                   'clear dark brown'
_exptl_crystal_size_max                 0.270
_exptl_crystal_size_mid                 0.160
_exptl_crystal_size_min                 0.120
_exptl_crystal_density_diffrn           1.328
_exptl_crystal_density_meas             ?
_exptl_crystal_density_method           'not measured'
_exptl_crystal_F_000                    702

_exptl_absorpt_coefficient_mu           0.523
_exptl_absorpt_correction_type          multi-scan
_exptl_absorpt_process_details          
    'SADABS Version 2008/1 (Bruker AXS, 2008)'
_exptl_absorpt_correction_T_min         0.67
_exptl_absorpt_correction_T_max         0.94

_exptl_special_details                  
;
; 

_diffrn_ambient_temperature             123.(2)

_diffrn_source                          ?
_diffrn_source_type                     'sealed tube'

_diffrn_radiation_type                  MoK\a
_diffrn_radiation_wavelength            0.71073
_diffrn_radiation_monochromator         graphite

_diffrn_measurement_device_type         'Bruker Smart APEX'
_diffrn_measurement_method              '\w and \f scans'

_diffrn_detector_area_resol_mean        8.3330

_diffrn_reflns_number                   14656
_diffrn_reflns_av_R_equivalents         0.0396
_diffrn_reflns_av_sigmaI/netI           0.0543
_diffrn_reflns_theta_min                1.84
_diffrn_reflns_theta_max                26.31
_diffrn_reflns_theta_full               26.31
_diffrn_measured_fraction_theta_max     0.994
_diffrn_measured_fraction_theta_full    0.994
_diffrn_reflns_limit_h_min              -13
_diffrn_reflns_limit_h_max              13
_diffrn_reflns_limit_k_min              -15
_diffrn_reflns_limit_k_max              15
_diffrn_reflns_limit_l_min              -17
_diffrn_reflns_limit_l_max              17

_refine_special_details                 
;
Refinement of F^2^ against ALL reflections.  The weighted R-factor wR and
goodness of fit S are based on F^2^, conventional R-factors R are based
on F, with F set to zero for negative F^2^. The threshold expression of
F^2^ > 2sigma(F^2^) is used only for calculating R-factors(gt) etc. and is
not relevant to the choice of reflections for refinement.  R-factors based
on F^2^ are statistically about twice as large as those based on F, and R-
factors based on ALL data will be even larger.
;

_reflns_number_total                    6766
_reflns_number_gt                       5273
_reflns_threshold_expression            >2sigma(I)

_refine_ls_structure_factor_coef        Fsqd
_refine_ls_matrix_type                  full
_refine_ls_R_factor_all                 0.0641
_refine_ls_R_factor_gt                  0.0462
_refine_ls_wR_factor_gt                 0.1163
_refine_ls_wR_factor_ref                0.1286
_refine_ls_goodness_of_fit_ref          1.014
_refine_ls_restrained_S_all             1.014
_refine_ls_number_reflns                6766
_refine_ls_number_parameters            408
_refine_ls_number_restraints            0
_refine_ls_hydrogen_treatment           constr
_refine_ls_weighting_scheme             calc
_refine_ls_weighting_details
    'calc w=1/[\s^2^(Fo^2^)+(0.0734P)^2^+0.5642P] where P=(Fo^2^+2Fc^2^)/3'

_atom_sites_solution_hydrogens          geom
_atom_sites_solution_primary            direct
_atom_sites_solution_secondary          difmap

_refine_ls_shift/su_max                 0.000
_refine_ls_shift/su_mean                0.000
_refine_diff_density_max                0.955
_refine_diff_density_min                -0.528
_refine_ls_extinction_method            none
_refine_ls_extinction_coef              ?

loop_
    _atom_type_symbol
    _atom_type_description
    _atom_type_scat_dispersion_real
    _atom_type_scat_dispersion_imag
    _atom_type_scat_source
    C C 0.0033 0.0016 'International Tables Vol C Tables 4.2.6.8 and 6.1.1.4'
    H H 0.0000 0.0000 'International Tables Vol C Tables 4.2.6.8 and 6.1.1.4'
    N N 0.0061 0.0033 'International Tables Vol C Tables 4.2.6.8 and 6.1.1.4'
    P P 0.1023 0.0942 'International Tables Vol C Tables 4.2.6.8 and 6.1.1.4'
    Mn Mn 0.3368 0.7283
     'International Tables Vol C Tables 4.2.6.8 and 6.1.1.4'

_computing_data_collection              
    'Bruker Instrument Service v2010, 9, 0, 0 (Bruker AXS, 2010)'
_computing_cell_refinement              'SAINT V7.68A (Bruker AXS, 2009)'
_computing_data_reduction               'SAINT V7.68A (Bruker AXS, 2009)'
_computing_structure_solution           'SHELXS-97 (Sheldrick, 2008)'
_computing_structure_refinement         'SHELXL-97 (Sheldrick, 2008)'
_computing_molecular_graphics           'XShell ver. 6.3.1 (Bruker AXS, 2004)'
_computing_publication_material         
    'Bruker APEX2 v2010.9-1 (Bruker AXS, 2010)'

loop_
    _atom_site_type_symbol
    _atom_site_label
    _atom_site_fract_x
    _atom_site_fract_y
    _atom_site_fract_z
    _atom_site_U_iso_or_equiv
    _atom_site_adp_type
    _atom_site_calc_flag
    _atom_site_refinement_flags
    _atom_site_occupancy
    _atom_site_disorder_assembly
    _atom_site_disorder_group
    Mn Mn1 -0.04406(4) 0.23726(3) 0.23425(2) 0.01958(12) Uani d . 1 . .
    P P1 -0.03945(7) 0.05774(6) 0.25092(5) 0.02202(16) Uani d . 1 . .
    P P2 0.16415(6) 0.38078(6) 0.29199(4) 0.02053(16) Uani d . 1 . .
    N N1 -0.1546(2) 0.22032(18) 0.34580(14) 0.0224(4) Uani d . 1 . .
    N N2 -0.1853(2) 0.27316(18) 0.18715(14) 0.0208(4) Uani d . 1 . .
    N N3 0.0131(2) 0.27330(17) 0.10465(14) 0.0208(4) Uani d . 1 . .
    C C1 -0.3695(3) 0.2218(3) 0.4155(2) 0.0353(7) Uani d . 1 . .
    H H1A -0.4076 0.1383 0.4314 0.053 Uiso calc R 1 . .
    H H1B -0.4444 0.24 0.3932 0.053 Uiso calc R 1 . .
    H H1C -0.3218 0.2765 0.4727 0.053 Uiso calc R 1 . .
    C C2 -0.2695(3) 0.2384(2) 0.33749(18) 0.0248(5) Uani d . 1 . .
    C C3 -0.2878(3) 0.2725(2) 0.24639(18) 0.0237(5) Uani d . 1 . .
    C C4 -0.3871(3) 0.3074(3) 0.2130(2) 0.0308(6) Uani d . 1 . .
    H H4 -0.4565 0.3088 0.2538 0.037 Uiso calc R 1 . .
    C C5 -0.3838(3) 0.3400(3) 0.1204(2) 0.0326(6) Uani d . 1 . .
    H H5 -0.4527 0.3613 0.0975 0.039 Uiso calc R 1 . .
    C C6 -0.2806(3) 0.3415(2) 0.06084(19) 0.0287(6) Uani d . 1 . .
    H H6 -0.2788 0.364 -0.0025 0.034 Uiso calc R 1 . .
    C C7 -0.1793(2) 0.3097(2) 0.09495(17) 0.0215(5) Uani d . 1 . .
    C C8 -0.0622(3) 0.3105(2) 0.04956(17) 0.0218(5) Uani d . 1 . .
    C C9 -0.0281(3) 0.3477(2) -0.04940(18) 0.0276(6) Uani d . 1 . .
    H H9A 0.0641 0.4146 -0.0473 0.041 Uiso calc R 1 . .
    H H9B -0.0956 0.3734 -0.0738 0.041 Uiso calc R 1 . .
    H H9C -0.0304 0.2792 -0.0919 0.041 Uiso calc R 1 . .
    C C10 -0.1240(3) 0.1838(2) 0.43738(17) 0.0274(6) Uani d . 1 . .
    H H10A -0.1802 0.1996 0.4874 0.033 Uiso calc R 1 . .
    H H10B -0.0259 0.2338 0.4574 0.033 Uiso calc R 1 . .
    C C11 -0.1529(3) 0.0510(2) 0.43052(19) 0.0307(6) Uani d . 1 . .
    H H11A -0.2436 0.0022 0.3965 0.037 Uiso calc R 1 . .
    H H11B -0.1576 0.0259 0.4961 0.037 Uiso calc R 1 . .
    C C12 -0.0429(3) 0.0254(2) 0.37767(18) 0.0287(6) Uani d . 1 . .
    H H12A -0.0621 -0.0603 0.3801 0.034 Uiso calc R 1 . .
    H H12B 0.0485 0.0758 0.4103 0.034 Uiso calc R 1 . .
    C C13 0.0999(3) 0.0249(2) 0.20351(19) 0.0254(5) Uani d . 1 . .
    C C14 0.0920(3) -0.0199(2) 0.1073(2) 0.0295(6) Uani d . 1 . .
    H H14 0.0086 -0.0441 0.07 0.035 Uiso calc R 1 . .
    C C15 0.2030(3) -0.0296(3) 0.0654(2) 0.0396(7) Uani d . 1 . .
    H H15 0.1956 -0.0594 -0.0004 0.047 Uiso calc R 1 . .
    C C16 0.3243(3) 0.0039(3) 0.1186(3) 0.0439(8) Uani d . 1 . .
    H H16 0.4008 -0.0022 0.0896 0.053 Uiso calc R 1 . .
    C C17 0.3344(3) 0.0463(3) 0.2145(3) 0.0405(7) Uani d . 1 . .
    H H17 0.4174 0.0681 0.2517 0.049 Uiso calc R 1 . .
    C C18 0.2232(3) 0.0571(2) 0.2568(2) 0.0320(6) Uani d . 1 . .
    H H18 0.2312 0.0868 0.3227 0.038 Uiso calc R 1 . .
    C C19 -0.1928(3) -0.0790(2) 0.20117(17) 0.0250(5) Uani d . 1 . .
    C C20 -0.3078(3) -0.0686(3) 0.1665(2) 0.0313(6) Uani d . 1 . .
    H H20 -0.3071 0.0088 0.1681 0.038 Uiso calc R 1 . .
    C C21 -0.4241(3) -0.1700(3) 0.1296(2) 0.0392(7) Uani d . 1 . .
    H H21 -0.5026 -0.162 0.1065 0.047 Uiso calc R 1 . .
    C C22 -0.4251(3) -0.2829(3) 0.1265(2) 0.0369(7) Uani d . 1 . .
    H H22 -0.5041 -0.3522 0.1004 0.044 Uiso calc R 1 . .
    C C23 -0.3119(3) -0.2952(2) 0.16099(19) 0.0323(6) Uani d . 1 . .
    H H23 -0.3133 -0.3729 0.1591 0.039 Uiso calc R 1 . .
    C C24 -0.1960(3) -0.1941(2) 0.19843(19) 0.0286(6) Uani d . 1 . .
    H H24 -0.1184 -0.2028 0.2224 0.034 Uiso calc R 1 . .
    C C25 0.1419(3) 0.2768(2) 0.06780(17) 0.0228(5) Uani d . 1 . .
    H H25A 0.1367 0.2722 -0.0032 0.027 Uiso calc R 1 . .
    H H25B 0.1535 0.2058 0.0859 0.027 Uiso calc R 1 . .
    C C26 0.2665(3) 0.3920(2) 0.10763(17) 0.0237(5) Uani d . 1 . .
    H H26A 0.3463 0.4022 0.0687 0.028 Uiso calc R 1 . .
    H H26B 0.2462 0.4622 0.1017 0.028 Uiso calc R 1 . .
    C C27 0.3041(2) 0.3902(2) 0.21269(17) 0.0237(5) Uani d . 1 . .
    H H27A 0.3883 0.4643 0.2337 0.028 Uiso calc R 1 . .
    H H27B 0.3246 0.3201 0.2187 0.028 Uiso calc R 1 . .
    C C28 0.2421(2) 0.3904(2) 0.41173(17) 0.0222(5) Uani d . 1 . .
    C C29 0.3260(3) 0.3335(3) 0.42813(19) 0.0311(6) Uani d . 1 . .
    H H29 0.3478 0.2916 0.3756 0.037 Uiso calc R 1 . .
    C C30 0.3785(3) 0.3367(3) 0.5198(2) 0.0371(7) Uani d . 1 . .
    H H30 0.4352 0.2969 0.5296 0.045 Uiso calc R 1 . .
    C C31 0.3483(3) 0.3977(3) 0.5967(2) 0.0361(7) Uani d . 1 . .
    H H31 0.3849 0.4006 0.6594 0.043 Uiso calc R 1 . .
    C C32 0.2646(3) 0.4546(3) 0.5824(2) 0.0345(7) Uani d . 1 . .
    H H32 0.2433 0.4962 0.6354 0.041 Uiso calc R 1 . .
    C C33 0.2113(3) 0.4510(2) 0.49044(18) 0.0293(6) Uani d . 1 . .
    H H33 0.1536 0.4901 0.4812 0.035 Uiso calc R 1 . .
    C C34 0.1731(3) 0.5343(2) 0.29547(17) 0.0238(5) Uani d . 1 . .
    C C35 0.2973(3) 0.6376(2) 0.2982(2) 0.0348(7) Uani d . 1 . .
    H H35 0.3819 0.6309 0.2975 0.042 Uiso calc R 1 . .
    C C36 0.2973(3) 0.7513(3) 0.3019(2) 0.0434(8) Uani d . 1 . .
    H H36 0.3819 0.8215 0.3021 0.052 Uiso calc R 1 . .
    C C37 0.1760(3) 0.7621(3) 0.3052(2) 0.0375(7) Uani d . 1 . .
    H H37 0.1768 0.8396 0.3084 0.045 Uiso calc R 1 . .
    C C38 0.0531(3) 0.6605(3) 0.3040(2) 0.0362(7) Uani d . 1 . .
    H H38 -0.031 0.668 0.3072 0.043 Uiso calc R 1 . .
    C C39 0.0518(3) 0.5471(2) 0.29822(19) 0.0301(6) Uani d . 1 . .
    H H39 -0.0335 0.4774 0.2961 0.036 Uiso calc R 1 . .

loop_
    _atom_site_aniso_label
    _atom_site_aniso_U_11
    _atom_site_aniso_U_22
    _atom_site_aniso_U_33
    _atom_site_aniso_U_12
    _atom_site_aniso_U_13
    _atom_site_aniso_U_23
    Mn1 0.0222(2) 0.0205(2) 0.0164(2) 0.01010(16) -0.00178(14) -0.00058(14)
    P1 0.0251(3) 0.0205(3) 0.0201(3) 0.0097(3) -0.0024(3) 0.0012(2)
    P2 0.0223(3) 0.0211(3) 0.0180(3) 0.0099(3) -0.0014(2) -0.0015(2)
    N1 0.0251(11) 0.0242(11) 0.0177(10) 0.0110(9) -0.0008(8) -0.0008(8)
    N2 0.0217(10) 0.0198(10) 0.0189(10) 0.0078(8) -0.0032(8) -0.0018(8)
    N3 0.0220(10) 0.0174(10) 0.0209(10) 0.0075(8) -0.0031(8) -0.0033(8)
    C1 0.0324(15) 0.0488(18) 0.0292(15) 0.0214(14) 0.0066(12) 0.0054(13)
    C2 0.0271(13) 0.0263(13) 0.0216(13) 0.0126(11) 0.0008(10) -0.0001(10)
    C3 0.0218(12) 0.0204(12) 0.0264(13) 0.0072(10) 0.0012(10) -0.0005(10)
    C4 0.0263(14) 0.0356(15) 0.0319(15) 0.0151(12) -0.0005(11) 0.0014(12)
    C5 0.0285(14) 0.0349(15) 0.0382(16) 0.0170(12) -0.0075(12) 0.0059(13)
    C6 0.0308(14) 0.0272(14) 0.0256(14) 0.0101(11) -0.0070(11) 0.0037(11)
    C7 0.0239(12) 0.0163(12) 0.0196(12) 0.0048(10) -0.0056(10) -0.0006(9)
    C8 0.0271(13) 0.0188(12) 0.0167(12) 0.0083(10) -0.0033(10) -0.0020(9)
    C9 0.0342(15) 0.0276(14) 0.0196(13) 0.0120(12) -0.0005(11) 0.0033(10)
    C10 0.0316(14) 0.0376(15) 0.0134(12) 0.0156(12) 0.0017(10) 0.0014(11)
    C11 0.0347(15) 0.0352(15) 0.0214(13) 0.0137(12) 0.0002(11) 0.0073(11)
    C12 0.0373(15) 0.0273(14) 0.0231(13) 0.0155(12) -0.0058(11) 0.0035(11)
    C13 0.0278(13) 0.0167(12) 0.0314(14) 0.0090(10) 0.0001(11) 0.0046(10)
    C14 0.0316(14) 0.0197(13) 0.0331(15) 0.0074(11) 0.0034(11) 0.0017(11)
    C15 0.0432(17) 0.0234(14) 0.0494(19) 0.0119(13) 0.0152(14) 0.0021(13)
    C16 0.0344(17) 0.0286(16) 0.071(2) 0.0141(13) 0.0221(16) 0.0131(15)
    C17 0.0273(15) 0.0300(15) 0.063(2) 0.0102(12) 0.0018(14) 0.0131(15)
    C18 0.0328(15) 0.0214(13) 0.0409(16) 0.0104(11) -0.0023(12) 0.0061(12)
    C19 0.0319(14) 0.0211(13) 0.0181(12) 0.0077(11) 0.0027(10) 0.0022(10)
    C20 0.0313(14) 0.0285(14) 0.0313(15) 0.0105(12) 0.0014(12) 0.0018(12)
    C21 0.0260(15) 0.0376(17) 0.0446(18) 0.0056(13) -0.0051(13) 0.0017(14)
    C22 0.0307(15) 0.0301(15) 0.0338(16) -0.0017(12) 0.0029(12) 0.0004(12)
    C23 0.0411(16) 0.0217(14) 0.0284(14) 0.0080(12) 0.0084(12) 0.0026(11)
    C24 0.0305(14) 0.0268(14) 0.0270(14) 0.0110(11) 0.0010(11) 0.0020(11)
    C25 0.0275(13) 0.0240(13) 0.0182(12) 0.0130(11) 0.0019(10) -0.0003(10)
    C26 0.0257(13) 0.0250(13) 0.0201(12) 0.0109(11) 0.0033(10) 0.0013(10)
    C27 0.0227(12) 0.0256(13) 0.0223(13) 0.0106(11) -0.0012(10) -0.0012(10)
    C28 0.0213(12) 0.0221(12) 0.0185(12) 0.0050(10) -0.0013(9) 0.0015(10)
    C29 0.0385(16) 0.0358(15) 0.0239(14) 0.0211(13) -0.0008(11) 0.0005(11)
    C30 0.0422(17) 0.0539(19) 0.0256(14) 0.0301(15) -0.0002(12) 0.0073(13)
    C31 0.0355(16) 0.0491(18) 0.0196(13) 0.0149(14) -0.0046(11) 0.0019(12)
    C32 0.0390(16) 0.0407(17) 0.0214(14) 0.0164(13) 0.0010(11) -0.0047(12)
    C33 0.0312(14) 0.0328(15) 0.0242(14) 0.0152(12) -0.0003(11) -0.0016(11)
    C34 0.0322(14) 0.0221(12) 0.0166(12) 0.0120(11) 0.0002(10) -0.0009(10)
    C35 0.0358(16) 0.0276(15) 0.0382(16) 0.0113(12) 0.0058(13) 0.0013(12)
    C36 0.0493(19) 0.0239(15) 0.0463(19) 0.0057(13) 0.0106(15) 0.0033(13)
    C37 0.067(2) 0.0262(15) 0.0260(15) 0.0250(15) 0.0087(14) 0.0059(11)
    C38 0.0507(18) 0.0342(16) 0.0316(16) 0.0260(14) 0.0008(13) 0.0016(12)
    C39 0.0351(15) 0.0271(14) 0.0284(14) 0.0147(12) -0.0019(11) -0.0018(11)

_geom_special_details                   
;
All esds (except the esd in the dihedral angle between two l.s. planes)
are estimated using the full covariance matrix.  The cell esds are taken
into account individually in the estimation of esds in distances, angles
and torsion angles; correlations between esds in cell parameters are only
used when they are defined by crystal symmetry.  An approximate (isotropic)
treatment of cell esds is used for estimating esds involving l.s. planes.
;

loop_
    _geom_bond_atom_site_label_1
    _geom_bond_atom_site_label_2
    _geom_bond_site_symmetry_2
    _geom_bond_distance
    _geom_bond_publ_flag
    Mn1 N2 . 1.887(2) ?
    Mn1 N1 . 1.944(2) ?
    Mn1 N3 . 1.949(2) ?
    Mn1 P2 . 2.2634(8) ?
    Mn1 P1 . 2.2697(8) ?
    P1 C13 . 1.830(3) ?
    P1 C12 . 1.851(3) ?
    P1 C19 . 1.854(3) ?
    P2 C28 . 1.840(2) ?
    P2 C27 . 1.850(3) ?
    P2 C34 . 1.851(3) ?
    N1 C2 . 1.354(3) ?
    N1 C10 . 1.476(3) ?
    N2 C3 . 1.385(3) ?
    N2 C7 . 1.398(3) ?
    N3 C8 . 1.355(3) ?
    N3 C25 . 1.469(3) ?
    C1 C2 . 1.506(4) ?
    C1 H1A . 0.98 ?
    C1 H1B . 0.98 ?
    C1 H1C . 0.98 ?
    C2 C3 . 1.416(4) ?
    C3 C4 . 1.403(4) ?
    C4 C5 . 1.388(4) ?
    C4 H4 . 0.95 ?
    C5 C6 . 1.390(4) ?
    C5 H5 . 0.95 ?
    C6 C7 . 1.402(4) ?
    C6 H6 . 0.95 ?
    C7 C8 . 1.414(3) ?
    C8 C9 . 1.498(3) ?
    C9 H9A . 0.98 ?
    C9 H9B . 0.98 ?
    C9 H9C . 0.98 ?
    C10 C11 . 1.525(4) ?
    C10 H10A . 0.99 ?
    C10 H10B . 0.99 ?
    C11 C12 . 1.532(4) ?
    C11 H11A . 0.99 ?
    C11 H11B . 0.99 ?
    C12 H12A . 0.99 ?
    C12 H12B . 0.99 ?
    C13 C14 . 1.397(4) ?
    C13 C18 . 1.398(4) ?
    C14 C15 . 1.383(4) ?
    C14 H14 . 0.95 ?
    C15 C16 . 1.378(5) ?
    C15 H15 . 0.95 ?
    C16 C17 . 1.383(5) ?
    C16 H16 . 0.95 ?
    C17 C18 . 1.393(4) ?
    C17 H17 . 0.95 ?
    C18 H18 . 0.95 ?
    C19 C20 . 1.387(4) ?
    C19 C24 . 1.403(4) ?
    C20 C21 . 1.390(4) ?
    C20 H20 . 0.95 ?
    C21 C22 . 1.385(4) ?
    C21 H21 . 0.95 ?
    C22 C23 . 1.381(4) ?
    C22 H22 . 0.95 ?
    C23 C24 . 1.387(4) ?
    C23 H23 . 0.95 ?
    C24 H24 . 0.95 ?
    C25 C26 . 1.531(3) ?
    C25 H25A . 0.99 ?
    C25 H25B . 0.99 ?
    C26 C27 . 1.528(3) ?
    C26 H26A . 0.99 ?
    C26 H26B . 0.99 ?
    C27 H27A . 0.99 ?
    C27 H27B . 0.99 ?
    C28 C29 . 1.391(4) ?
    C28 C33 . 1.399(4) ?
    C29 C30 . 1.389(4) ?
    C29 H29 . 0.95 ?
    C30 C31 . 1.380(4) ?
    C30 H30 . 0.95 ?
    C31 C32 . 1.382(4) ?
    C31 H31 . 0.95 ?
    C32 C33 . 1.395(4) ?
    C32 H32 . 0.95 ?
    C33 H33 . 0.95 ?
    C34 C39 . 1.382(4) ?
    C34 C35 . 1.394(4) ?
    C35 C36 . 1.400(4) ?
    C35 H35 . 0.95 ?
    C36 C37 . 1.369(5) ?
    C36 H36 . 0.95 ?
    C37 C38 . 1.377(4) ?
    C37 H37 . 0.95 ?
    C38 C39 . 1.389(4) ?
    C38 H38 . 0.95 ?
    C39 H39 . 0.95 ?

loop_
    _geom_angle_atom_site_label_1
    _geom_angle_atom_site_label_2
    _geom_angle_atom_site_label_3
    _geom_angle_site_symmetry_1
    _geom_angle_site_symmetry_3
    _geom_angle
    _geom_angle_publ_flag
    N2 Mn1 N1 . . 78.69(9) ?
    N2 Mn1 N3 . . 78.91(9) ?
    N1 Mn1 N3 . . 157.54(9) ?
    N2 Mn1 P2 . . 123.14(6) ?
    N1 Mn1 P2 . . 102.14(6) ?
    N3 Mn1 P2 . . 88.82(6) ?
    N2 Mn1 P1 . . 130.90(6) ?
    N1 Mn1 P1 . . 90.60(6) ?
    N3 Mn1 P1 . . 105.32(6) ?
    P2 Mn1 P1 . . 105.93(3) ?
    C13 P1 C12 . . 103.74(12) ?
    C13 P1 C19 . . 101.18(12) ?
    C12 P1 C19 . . 99.13(12) ?
    C13 P1 Mn1 . . 120.81(8) ?
    C12 P1 Mn1 . . 112.79(9) ?
    C19 P1 Mn1 . . 116.23(9) ?
    C28 P2 C27 . . 102.23(11) ?
    C28 P2 C34 . . 99.89(11) ?
    C27 P2 C34 . . 102.38(12) ?
    C28 P2 Mn1 . . 124.93(8) ?
    C27 P2 Mn1 . . 112.60(8) ?
    C34 P2 Mn1 . . 111.96(8) ?
    C2 N1 C10 . . 118.2(2) ?
    C2 N1 Mn1 . . 117.88(17) ?
    C10 N1 Mn1 . . 123.84(16) ?
    C3 N2 C7 . . 120.4(2) ?
    C3 N2 Mn1 . . 119.99(17) ?
    C7 N2 Mn1 . . 119.41(16) ?
    C8 N3 C25 . . 118.1(2) ?
    C8 N3 Mn1 . . 117.85(17) ?
    C25 N3 Mn1 . . 123.64(15) ?
    C2 C1 H1A . . 109.5 ?
    C2 C1 H1B . . 109.5 ?
    H1A C1 H1B . . 109.5 ?
    C2 C1 H1C . . 109.5 ?
    H1A C1 H1C . . 109.5 ?
    H1B C1 H1C . . 109.5 ?
    N1 C2 C3 . . 112.8(2) ?
    N1 C2 C1 . . 124.1(2) ?
    C3 C2 C1 . . 123.1(2) ?
    N2 C3 C4 . . 119.6(2) ?
    N2 C3 C2 . . 110.5(2) ?
    C4 C3 C2 . . 129.8(2) ?
    C5 C4 C3 . . 120.0(3) ?
    C5 C4 H4 . . 120.0 ?
    C3 C4 H4 . . 120.0 ?
    C4 C5 C6 . . 120.6(2) ?
    C4 C5 H5 . . 119.7 ?
    C6 C5 H5 . . 119.7 ?
    C5 C6 C7 . . 119.5(2) ?
    C5 C6 H6 . . 120.3 ?
    C7 C6 H6 . . 120.3 ?
    N2 C7 C6 . . 119.8(2) ?
    N2 C7 C8 . . 110.9(2) ?
    C6 C7 C8 . . 129.3(2) ?
    N3 C8 C7 . . 112.8(2) ?
    N3 C8 C9 . . 124.5(2) ?
    C7 C8 C9 . . 122.7(2) ?
    C8 C9 H9A . . 109.5 ?
    C8 C9 H9B . . 109.5 ?
    H9A C9 H9B . . 109.5 ?
    C8 C9 H9C . . 109.5 ?
    H9A C9 H9C . . 109.5 ?
    H9B C9 H9C . . 109.5 ?
    N1 C10 C11 . . 112.8(2) ?
    N1 C10 H10A . . 109.0 ?
    C11 C10 H10A . . 109.0 ?
    N1 C10 H10B . . 109.0 ?
    C11 C10 H10B . . 109.0 ?
    H10A C10 H10B . . 107.8 ?
    C10 C11 C12 . . 112.7(2) ?
    C10 C11 H11A . . 109.1 ?
    C12 C11 H11A . . 109.1 ?
    C10 C11 H11B . . 109.1 ?
    C12 C11 H11B . . 109.1 ?
    H11A C11 H11B . . 107.8 ?
    C11 C12 P1 . . 111.26(17) ?
    C11 C12 H12A . . 109.4 ?
    P1 C12 H12A . . 109.4 ?
    C11 C12 H12B . . 109.4 ?
    P1 C12 H12B . . 109.4 ?
    H12A C12 H12B . . 108.0 ?
    C14 C13 C18 . . 117.7(3) ?
    C14 C13 P1 . . 119.7(2) ?
    C18 C13 P1 . . 122.1(2) ?
    C15 C14 C13 . . 121.4(3) ?
    C15 C14 H14 . . 119.3 ?
    C13 C14 H14 . . 119.3 ?
    C16 C15 C14 . . 120.2(3) ?
    C16 C15 H15 . . 119.9 ?
    C14 C15 H15 . . 119.9 ?
    C15 C16 C17 . . 119.8(3) ?
    C15 C16 H16 . . 120.1 ?
    C17 C16 H16 . . 120.1 ?
    C16 C17 C18 . . 120.2(3) ?
    C16 C17 H17 . . 119.9 ?
    C18 C17 H17 . . 119.9 ?
    C17 C18 C13 . . 120.8(3) ?
    C17 C18 H18 . . 119.6 ?
    C13 C18 H18 . . 119.6 ?
    C20 C19 C24 . . 118.7(2) ?
    C20 C19 P1 . . 119.9(2) ?
    C24 C19 P1 . . 121.4(2) ?
    C19 C20 C21 . . 120.8(3) ?
    C19 C20 H20 . . 119.6 ?
    C21 C20 H20 . . 119.6 ?
    C22 C21 C20 . . 119.8(3) ?
    C22 C21 H21 . . 120.1 ?
    C20 C21 H21 . . 120.1 ?
    C23 C22 C21 . . 120.3(3) ?
    C23 C22 H22 . . 119.8 ?
    C21 C22 H22 . . 119.8 ?
    C22 C23 C24 . . 119.9(3) ?
    C22 C23 H23 . . 120.0 ?
    C24 C23 H23 . . 120.0 ?
    C23 C24 C19 . . 120.5(3) ?
    C23 C24 H24 . . 119.8 ?
    C19 C24 H24 . . 119.8 ?
    N3 C25 C26 . . 111.53(19) ?
    N3 C25 H25A . . 109.3 ?
    C26 C25 H25A . . 109.3 ?
    N3 C25 H25B . . 109.3 ?
    C26 C25 H25B . . 109.3 ?
    H25A C25 H25B . . 108.0 ?
    C27 C26 C25 . . 112.5(2) ?
    C27 C26 H26A . . 109.1 ?
    C25 C26 H26A . . 109.1 ?
    C27 C26 H26B . . 109.1 ?
    C25 C26 H26B . . 109.1 ?
    H26A C26 H26B . . 107.8 ?
    C26 C27 P2 . . 112.10(17) ?
    C26 C27 H27A . . 109.2 ?
    P2 C27 H27A . . 109.2 ?
    C26 C27 H27B . . 109.2 ?
    P2 C27 H27B . . 109.2 ?
    H27A C27 H27B . . 107.9 ?
    C29 C28 C33 . . 118.1(2) ?
    C29 C28 P2 . . 121.97(19) ?
    C33 C28 P2 . . 119.84(19) ?
    C30 C29 C28 . . 121.2(3) ?
    C30 C29 H29 . . 119.4 ?
    C28 C29 H29 . . 119.4 ?
    C31 C30 C29 . . 120.0(3) ?
    C31 C30 H30 . . 120.0 ?
    C29 C30 H30 . . 120.0 ?
    C30 C31 C32 . . 119.9(3) ?
    C30 C31 H31 . . 120.1 ?
    C32 C31 H31 . . 120.1 ?
    C31 C32 C33 . . 120.2(3) ?
    C31 C32 H32 . . 119.9 ?
    C33 C32 H32 . . 119.9 ?
    C32 C33 C28 . . 120.6(3) ?
    C32 C33 H33 . . 119.7 ?
    C28 C33 H33 . . 119.7 ?
    C39 C34 C35 . . 118.7(2) ?
    C39 C34 P2 . . 118.61(19) ?
    C35 C34 P2 . . 122.7(2) ?
    C34 C35 C36 . . 119.9(3) ?
    C34 C35 H35 . . 120.0 ?
    C36 C35 H35 . . 120.0 ?
    C37 C36 C35 . . 120.4(3) ?
    C37 C36 H36 . . 119.8 ?
    C35 C36 H36 . . 119.8 ?
    C36 C37 C38 . . 120.0(3) ?
    C36 C37 H37 . . 120.0 ?
    C38 C37 H37 . . 120.0 ?
    C37 C38 C39 . . 120.0(3) ?
    C37 C38 H38 . . 120.0 ?
    C39 C38 H38 . . 120.0 ?
    C34 C39 C38 . . 120.9(3) ?
    C34 C39 H39 . . 119.5 ?
    C38 C39 H39 . . 119.5 ?

 
_iucr_refine_instructions_details
;
TITL Tufan_1_185_0m in P-1
CELL 0.71073 10.7727 12.3414 14.0038 95.103 90.505 115.432
ZERR 2.00 0.0020 0.0023 0.0026 0.003 0.003 0.002
LATT 1
SFAC C  H  N  P  Mn
UNIT 78  82  6  4  2
L.S. 4
ACTA
BOND $H
FMAP 2
PLAN -5
SIZE 0.123 0.163 0.268
TEMP -150.000
WGHT    0.073400    0.564200
FVAR       0.15365
MN1   5   -0.044062    0.237257    0.234255    11.00000    0.02219    0.02052 =
         0.01642   -0.00058   -0.00178    0.01010
P1    4   -0.039449    0.057741    0.250918    11.00000    0.02510    0.02050 =
         0.02008    0.00117   -0.00236    0.00974
P2    4    0.164151    0.380780    0.291986    11.00000    0.02230    0.02109 =
         0.01800   -0.00154   -0.00140    0.00991
N1    3   -0.154628    0.220320    0.345799    11.00000    0.02512    0.02416 =
         0.01774   -0.00079   -0.00083    0.01097
N2    3   -0.185311    0.273162    0.187151    11.00000    0.02169    0.01976 =
         0.01887   -0.00181   -0.00321    0.00781
N3    3    0.013117    0.273299    0.104648    11.00000    0.02202    0.01742 =
         0.02089   -0.00327   -0.00305    0.00754
C1    1   -0.369535    0.221840    0.415502    11.00000    0.03241    0.04876 =
         0.02920    0.00538    0.00665    0.02142
AFIX 137
H1A   2   -0.407576    0.138265    0.431356    11.00000   -1.50000
H1B   2   -0.444363    0.239973    0.393193    11.00000   -1.50000
H1C   2   -0.321768    0.276508    0.472720    11.00000   -1.50000
AFIX   0
C2    1   -0.269487    0.238400    0.337490    11.00000    0.02708    0.02632 =
         0.02159   -0.00014    0.00082    0.01262
C3    1   -0.287796    0.272533    0.246391    11.00000    0.02179    0.02036 =
         0.02642   -0.00047    0.00122    0.00717
C4    1   -0.387055    0.307420    0.213005    11.00000    0.02626    0.03559 =
         0.03191    0.00145   -0.00051    0.01507
AFIX  43
H4    2   -0.456473    0.308770    0.253805    11.00000   -1.20000
AFIX   0
C5    1   -0.383783    0.339953    0.120365    11.00000    0.02849    0.03492 =
         0.03823    0.00588   -0.00749    0.01704
AFIX  43
H5    2   -0.452675    0.361341    0.097455    11.00000   -1.20000
AFIX   0
C6    1   -0.280631    0.341513    0.060844    11.00000    0.03076    0.02720 =
         0.02562    0.00366   -0.00696    0.01006
AFIX  43
H6    2   -0.278782    0.363953   -0.002470    11.00000   -1.20000
AFIX   0
C7    1   -0.179274    0.309707    0.094951    11.00000    0.02387    0.01627 =
         0.01960   -0.00062   -0.00563    0.00477
C8    1   -0.062190    0.310542    0.049556    11.00000    0.02715    0.01884 =
         0.01672   -0.00198   -0.00334    0.00829
C9    1   -0.028066    0.347650   -0.049405    11.00000    0.03423    0.02763 =
         0.01955    0.00328   -0.00050    0.01195
AFIX 137
H9A   2    0.064116    0.414629   -0.047275    11.00000   -1.50000
H9B   2   -0.095630    0.373372   -0.073782    11.00000   -1.50000
H9C   2   -0.030356    0.279233   -0.091916    11.00000   -1.50000
AFIX   0
C10   1   -0.123969    0.183812    0.437376    11.00000    0.03162    0.03762 =
         0.01335    0.00140    0.00170    0.01558
AFIX  23
H10A  2   -0.180212    0.199559    0.487405    11.00000   -1.20000
H10B  2   -0.025875    0.233768    0.457438    11.00000   -1.20000
AFIX   0
C11   1   -0.152869    0.051026    0.430521    11.00000    0.03475    0.03520 =
         0.02138    0.00730    0.00016    0.01365
AFIX  23
H11A  2   -0.243592    0.002174    0.396513    11.00000   -1.20000
H11B  2   -0.157609    0.025861    0.496089    11.00000   -1.20000
AFIX   0
C12   1   -0.042877    0.025397    0.377667    11.00000    0.03727    0.02731 =
         0.02307    0.00346   -0.00576    0.01550
AFIX  23
H12A  2   -0.062138   -0.060276    0.380052    11.00000   -1.20000
H12B  2    0.048469    0.075818    0.410313    11.00000   -1.20000
AFIX   0
C13   1    0.099922    0.024944    0.203506    11.00000    0.02783    0.01673 =
         0.03142    0.00462    0.00014    0.00904
C14   1    0.091990   -0.019852    0.107322    11.00000    0.03162    0.01969 =
         0.03313    0.00172    0.00344    0.00737
AFIX  43
H14   2    0.008635   -0.044120    0.069969    11.00000   -1.20000
AFIX   0
C15   1    0.202985   -0.029588    0.065378    11.00000    0.04320    0.02341 =
         0.04941    0.00208    0.01519    0.01192
AFIX  43
H15   2    0.195573   -0.059428   -0.000356    11.00000   -1.20000
AFIX   0
C16   1    0.324344    0.003860    0.118629    11.00000    0.03443    0.02856 =
         0.07114    0.01308    0.02209    0.01412
AFIX  43
H16   2    0.400768   -0.002210    0.089567    11.00000   -1.20000
AFIX   0
C17   1    0.334430    0.046293    0.214541    11.00000    0.02729    0.02998 =
         0.06340    0.01308    0.00178    0.01019
AFIX  43
H17   2    0.417426    0.068092    0.251673    11.00000   -1.20000
AFIX   0
C18   1    0.223184    0.057146    0.256825    11.00000    0.03276    0.02136 =
         0.04086    0.00613   -0.00226    0.01037
AFIX  43
H18   2    0.231166    0.086770    0.322654    11.00000   -1.20000
AFIX   0
C19   1   -0.192750   -0.078991    0.201168    11.00000    0.03194    0.02109 =
         0.01815    0.00219    0.00271    0.00766
C20   1   -0.307782   -0.068586    0.166540    11.00000    0.03130    0.02848 =
         0.03132    0.00178    0.00136    0.01051
AFIX  43
H20   2   -0.307050    0.008803    0.168129    11.00000   -1.20000
AFIX   0
C21   1   -0.424086   -0.170039    0.129550    11.00000    0.02604    0.03756 =
         0.04463    0.00170   -0.00507    0.00557
AFIX  43
H21   2   -0.502594   -0.162000    0.106476    11.00000   -1.20000
AFIX   0
C22   1   -0.425108   -0.282899    0.126453    11.00000    0.03065    0.03008 =
         0.03379    0.00035    0.00293   -0.00173
AFIX  43
H22   2   -0.504119   -0.352194    0.100435    11.00000   -1.20000
AFIX   0
C23   1   -0.311856   -0.295239    0.160992    11.00000    0.04112    0.02170 =
         0.02839    0.00256    0.00838    0.00799
AFIX  43
H23   2   -0.313286   -0.372905    0.159111    11.00000   -1.20000
AFIX   0
C24   1   -0.196033   -0.194095    0.198428    11.00000    0.03045    0.02676 =
         0.02699    0.00202    0.00100    0.01100
AFIX  43
H24   2   -0.118401   -0.202837    0.222374    11.00000   -1.20000
AFIX   0
C25   1    0.141868    0.276753    0.067798    11.00000    0.02746    0.02403 =
         0.01824   -0.00032    0.00189    0.01296
AFIX  23
H25A  2    0.136738    0.272237   -0.003160    11.00000   -1.20000
H25B  2    0.153454    0.205759    0.085870    11.00000   -1.20000
AFIX   0
C26   1    0.266485    0.392046    0.107629    11.00000    0.02568    0.02501 =
         0.02013    0.00126    0.00330    0.01092
AFIX  23
H26A  2    0.346333    0.402159    0.068746    11.00000   -1.20000
H26B  2    0.246174    0.462217    0.101662    11.00000   -1.20000
AFIX   0
C27   1    0.304138    0.390182    0.212694    11.00000    0.02274    0.02560 =
         0.02228   -0.00119   -0.00121    0.01063
AFIX  23
H27A  2    0.388311    0.464273    0.233685    11.00000   -1.20000
H27B  2    0.324620    0.320120    0.218746    11.00000   -1.20000
AFIX   0
C28   1    0.242066    0.390420    0.411733    11.00000    0.02134    0.02206 =
         0.01848    0.00146   -0.00126    0.00495
C29   1    0.325991    0.333481    0.428134    11.00000    0.03853    0.03583 =
         0.02388    0.00052   -0.00076    0.02112
AFIX  43
H29   2    0.347813    0.291616    0.375636    11.00000   -1.20000
AFIX   0
C30   1    0.378493    0.336682    0.519830    11.00000    0.04218    0.05393 =
         0.02563    0.00726   -0.00016    0.03007
AFIX  43
H30   2    0.435224    0.296853    0.529632    11.00000   -1.20000
AFIX   0
C31   1    0.348260    0.397722    0.596724    11.00000    0.03547    0.04911 =
         0.01961    0.00194   -0.00455    0.01494
AFIX  43
H31   2    0.384913    0.400645    0.659355    11.00000   -1.20000
AFIX   0
C32   1    0.264606    0.454554    0.582437    11.00000    0.03899    0.04069 =
         0.02143   -0.00466    0.00105    0.01638
AFIX  43
H32   2    0.243314    0.496157    0.635388    11.00000   -1.20000
AFIX   0
C33   1    0.211319    0.450998    0.490439    11.00000    0.03123    0.03283 =
         0.02420   -0.00163   -0.00026    0.01518
AFIX  43
H33   2    0.153640    0.490071    0.481177    11.00000   -1.20000
AFIX   0
C34   1    0.173077    0.534294    0.295468    11.00000    0.03224    0.02213 =
         0.01663   -0.00087    0.00020    0.01202
C35   1    0.297280    0.637612    0.298158    11.00000    0.03575    0.02756 =
         0.03823    0.00130    0.00584    0.01132
AFIX  43
H35   2    0.381860    0.630856    0.297460    11.00000   -1.20000
AFIX   0
C36   1    0.297283    0.751322    0.301889    11.00000    0.04926    0.02387 =
         0.04628    0.00326    0.01062    0.00567
AFIX  43
H36   2    0.381931    0.821473    0.302108    11.00000   -1.20000
AFIX   0
C37   1    0.176046    0.762072    0.305224    11.00000    0.06651    0.02620 =
         0.02600    0.00592    0.00874    0.02504
AFIX  43
H37   2    0.176770    0.839554    0.308356    11.00000   -1.20000
AFIX   0
C38   1    0.053055    0.660520    0.304038    11.00000    0.05073    0.03417 =
         0.03155    0.00159    0.00077    0.02601
AFIX  43
H38   2   -0.031003    0.668022    0.307198    11.00000   -1.20000
AFIX   0
C39   1    0.051838    0.547093    0.298221    11.00000    0.03512    0.02715 =
         0.02839   -0.00181   -0.00190    0.01468
AFIX  43
H39   2   -0.033537    0.477366    0.296106    11.00000   -1.20000
HKLF 4 1 1 0 0 0 1 0 0 0 1
 
REM  Tufan_1_185_0m in P-1
REM R1 =  0.0462 for   5273 Fo > 4sig(Fo)  and  0.0641 for all   6766 data
REM    408 parameters refined using      0 restraints
 
END  
     
WGHT      0.0734      0.5642 
REM Highest difference peak  0.955,  deepest hole -0.528,  1-sigma level  0.081
Q1    1  -0.0726  0.1425  0.2377  11.00000  0.05    0.95
Q2    1   0.0145  0.3251  0.2309  11.00000  0.05    0.65
Q3    1   0.2017  0.4707  0.2908  11.00000  0.05    0.63
Q4    1  -0.0516  0.3180  0.2244  11.00000  0.05    0.54
Q5    1   0.1030  0.3000  0.2907  11.00000  0.05    0.45
;
